# Supplementary material
Source: Springer Nature journal article supplement (https://www.springermedizin.de/resource/supplementary/12913_2011_2089_MOESM1_ESM.pdf/9529710)
Supplement: MOESM1 [file 9529710]

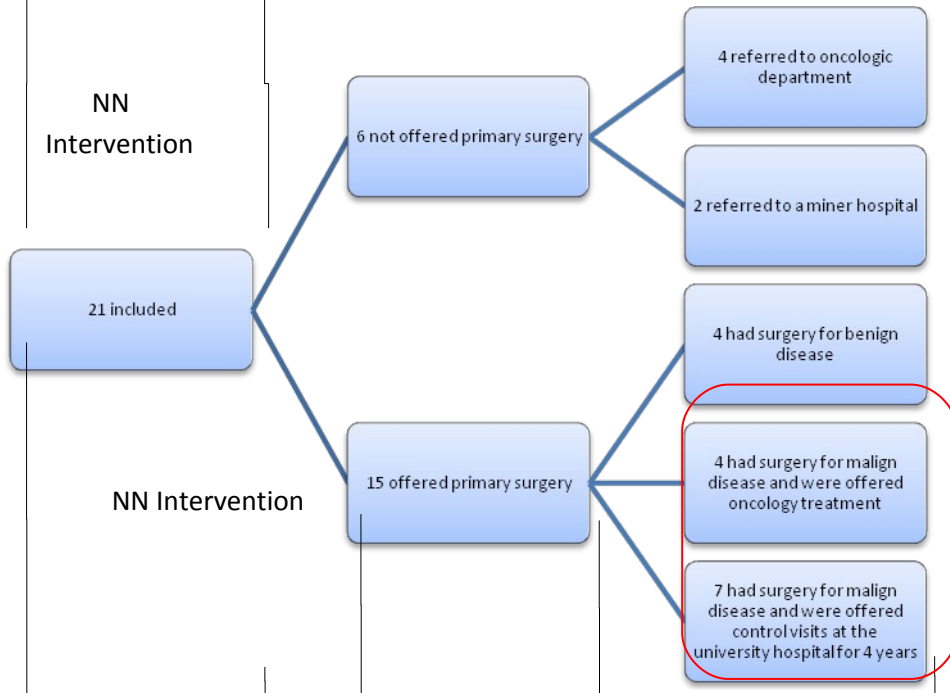

NN  
Intervention

21 included

6 not offered primary surgery

4 referred to oncologic  
department

2 referred to a minor hospital

NN Intervention

15 offered primary surgery

4 had surgery for benign  
disease

4 had surgery for malign  
disease and were offered  
oncology treatment

7 had surgery for malign  
disease and were offered  
control visits at the  
university hospital for 4 years

Trajectory of cancer  
for closely followed  
patients

Outpatient  
clinic

In-hospital  
period

Discharge

Three months  
after inclusion
